# Supplementary material for: Phosphorus-doped CoS2 nanosheet arrays as ultra-efficient electrocatalysts for the hydrogen evolution reaction
Source: Royal Society of Chemistry journal article supplement (doi:10.1039/c5cc05541e), 2015-01-01
Supplement: c5cc05541e1.pdf [file c5cc05541e1.pdf]

# Electronic Supplementary Information

## Phosphorus-Doped CoS<sub>2</sub> Nanosheet Arrays as Ultra-efficient Electrocatalysts for the Hydrogen Evolution Reaction

Canbin Ouyang,<sup>+</sup> Xin Wang<sup>+</sup> and Shuangyin Wang<sup>\*</sup>

### Experimental Section

Commercial carbon fiber paper (HCP030) was purchased from Shanghai HeSen Electronic Co. Ltd. Co(NO)<sub>3</sub> • 6H<sub>2</sub>O and S powder was purchased from a commercial company. All the chemical reagents were used without further purification. All solutions used in the experiments were prepared with DI water (18.25 M Ω).

**Preparation of Co(OH)<sub>2</sub> nanosheets on carbon fiber paper:** The carbon fiber paper was initially treated at 400 °C for 16h. A three-electrode system was used for electrodeposition with the pretreated CFP (1 cm<sup>2</sup>) as the working electrode, a platinum mesh (1 cm × 1 cm) as the counter electrode and saturated calomel electrode (SCE) as the reference electrode. The electrolyte solution of 20 mM Co(NO)<sub>3</sub> • 6H<sub>2</sub>O was used for potentiostatic deposition of Co(OH)<sub>2</sub> nanosheets onto CFP. The electrodeposition experiments were carried out at a constant potential at -1 V (vs. SCE) for 20 min at (28 ± 1) °C using an Autolab electrochemical workstation (Autolab PGSTAT302N, Metrohm-Autolab BV, Netherlands). After electrodeposition, the deposited green CFP was taken out and washed with deionized water several times and finally dried in vacuum at 60 °C for 12 h.

**Preparation of CoS<sub>2</sub>/P:** Firstly, the electrodeposited Co(OH)<sub>2</sub>/CFP was placed in the center of the furnace tube while 500 mg S powder was placed in a quartz boat which sat at the upstream of the furnace tube. The Co(OH)<sub>2</sub> nanosheets then reacted with S powder at 400 °C for 1 h with a heating rate of 8 °C min<sup>-1</sup> under Ar (30 sccm) environment. Secondly, 0.1 g NaH<sub>2</sub>PO<sub>2</sub> • H<sub>2</sub>O in a quartz boat was placed in the

center of the furnace tube and the quartz boat with obtained CoS<sub>2</sub>/CFP was placed at the downstream of the furnace tube. The phosphorization reaction was performed at 300 °C for 1 h with a heating rate of 2 °C min<sup>-1</sup> under Ar (30 sccm) environment.

After naturally cooling down to the room temperature, the CoS<sub>2</sub>/P was obtained.

**Electrochemical measurements:** All the electrochemical measurements including CV and LSV were carried out using an electrochemical workstation (CHI 600E, CH Instrument, USA) with a typical three-electrode system. A platinum mesh was used as counter electrode and saturated calomel electrode (SCE) as reference electrode and the obtained samples (CoS<sub>2</sub>/P and CoS<sub>2</sub>) were used as the working electrode. The EIS test was performed at a potential of -0.363 V (vs SCE) using an Autolab electrochemical workstation (Autolab PGSTAT302N, Metrohm-Autolab BV, Netherlands). All the measurements were conducted in 0.5 M H<sub>2</sub>SO<sub>4</sub> at room temperature. Potentials were referenced to a reversible hydrogen electrode (RHE) by adding a value of 0.273 V. All data was presented with IR correction.

**Characterization:** The crystal structures of the samples were characterized using powder X-ray diffraction (XRD, Bruker D8 Advance diffractometer, Cu Kα1). The Raman spectra were collected on a Raman spectrometer (Labram-010) using 632 nm laser. The surface morphology and microstructure were observed by scanning electron microscope (SEM, Hitachi, S-4800) and transmission electron microscope (TEM, JEOL, JEM-2010). The X-ray photoelectron spectroscopy (XPS) analysis was performed on an ESCALAB 250Xi X-ray photoelectron spectrometer using Mg as the excitation source.

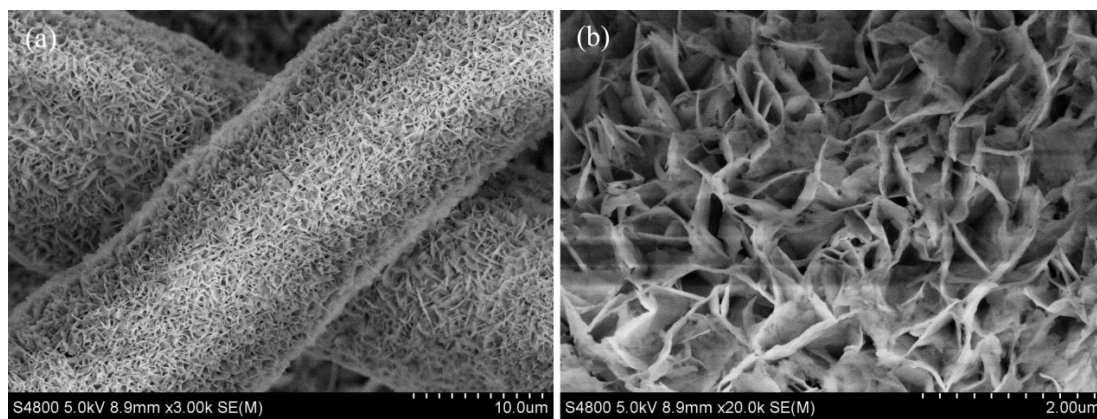

Figure S1. SEM of electrodeposited  $\text{Co(OH)}_2$  nanosheets: low magnification (a); high magnification (b).

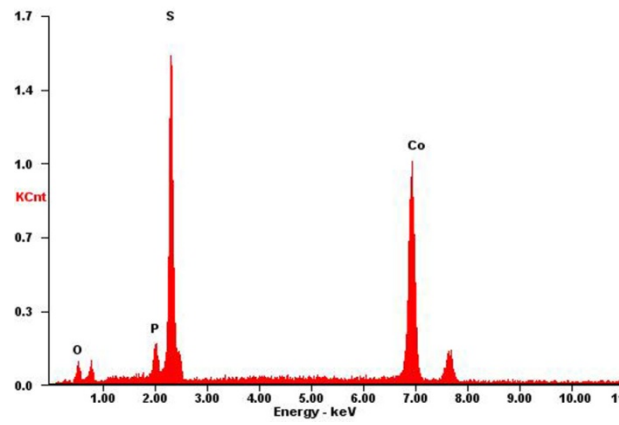

Figure S2. SEM-EDX of  $\text{CoS}_2/\text{P}$

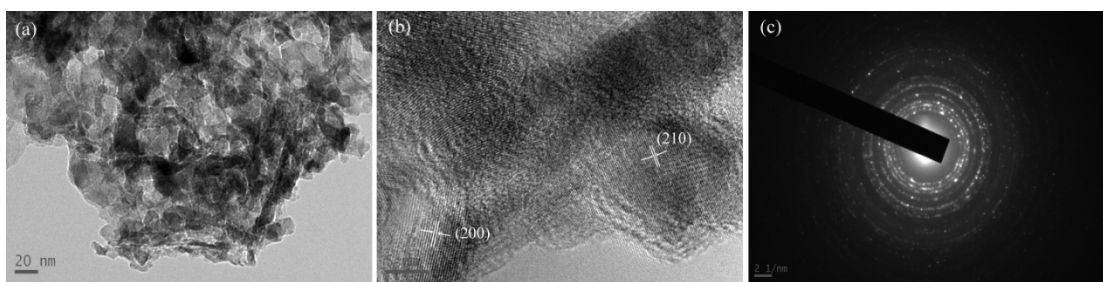

Figure S3. TEM image of CoS<sub>2</sub> (a); HRTEM image of CoS<sub>2</sub> with the d spacing of (210) (200) plane indicated (b); SAED spectrum of CoS<sub>2</sub> (c).

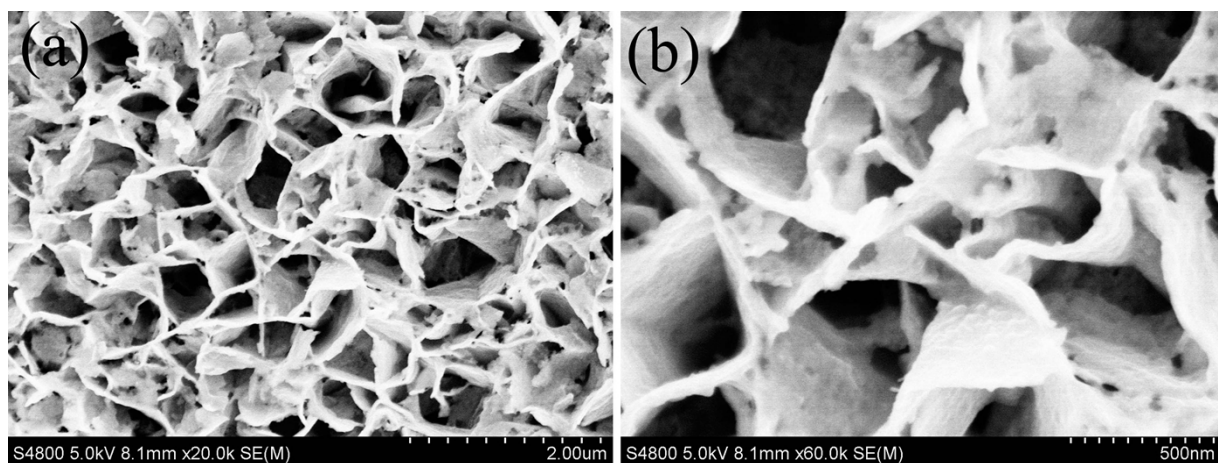

Figure S4. Magnifying SEM images of CoS<sub>2</sub>/P.

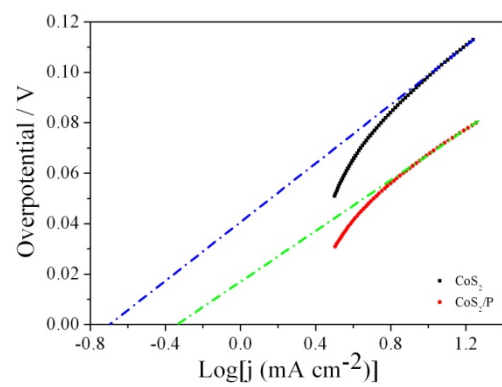

Figure S5. Calculation of exchange current density for CoS<sub>2</sub>/P and CoS<sub>2</sub>.

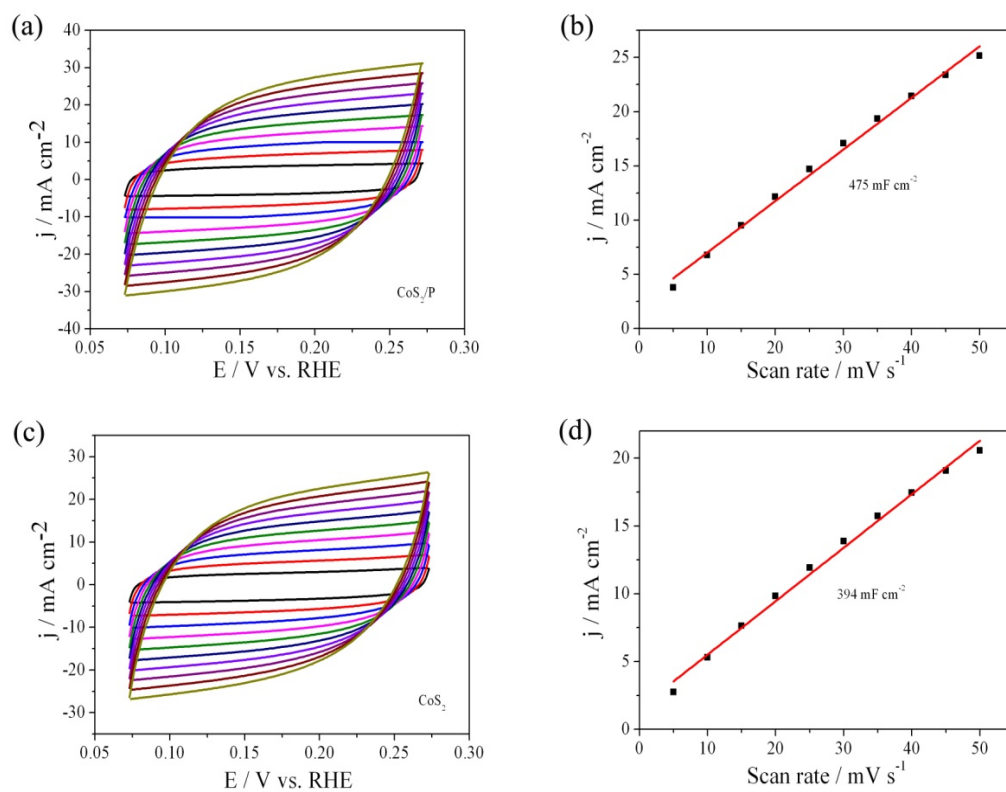

Figure S6. Cyclic voltammograms (CVs) for CoS<sub>2</sub>/P measured at different scan rates from 5 to 50 mV s<sup>-1</sup> (a); Plot of the current density at 0.173 V (vs. RHE) vs the scan rate for CoS<sub>2</sub>/P (b); Cyclic voltammograms (CVs) for CoS<sub>2</sub> measured at different scan rates from 5 to 50 mV s<sup>-1</sup> (c); Plot of the current density at 0.173 V (vs. RHE) vs the scan rate for CoS<sub>2</sub>(d).



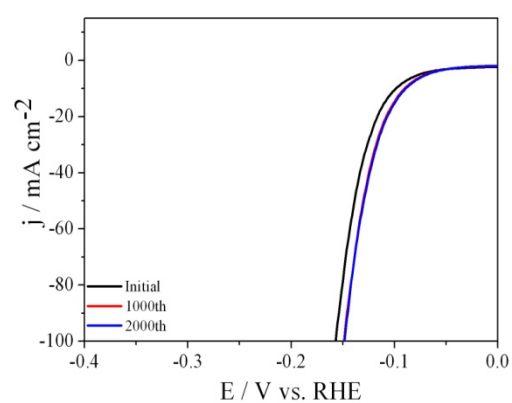

Figure S7. Polarization curves of CoS<sub>2</sub> initially and after 1000 and 2000 CV cycles with a scan rate of 100 mV s<sup>-1</sup> in 0.5 M H<sub>2</sub>SO<sub>4</sub>.

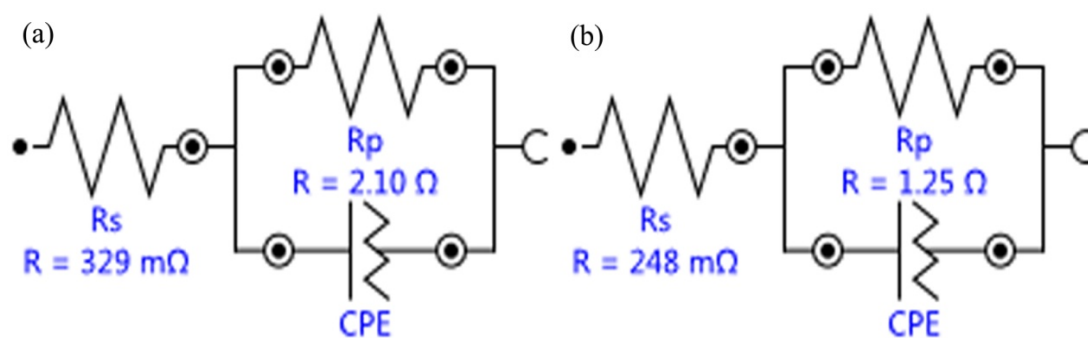

Figure S8. Electrochemical impedance spectroscopy (EIS) fitting results for  $\text{CoS}_2$  and  $\text{CoS}_2/\text{P}$  recorded at 0.09 V vs. RHE. inset: the corresponding equivalent circuit consisting of an electrolyte resistance ( $R_s$ ), a charge-transfer resistance ( $R_p$ ) and a constant-phase element (CPE)

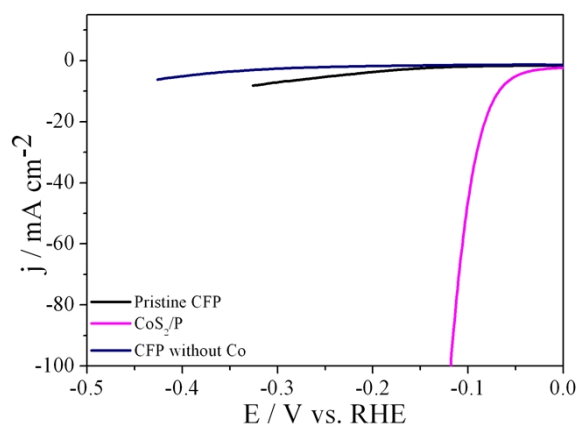

Figure S9. Polarization curves of pristine CFP, CoS<sub>2</sub>/P and CFP without cobalt under the same experiments as CoS<sub>2</sub>/P.

As shown in Figure S9, the activity of the carbon fiber paper without Co was almost the same as the pristine carbon fiber paper, hence, it could not be comparable to CoS<sub>2</sub>/P. S or P species might not be doped into the carbon fiber paper during the preparation process because S or P doping needs much higher temperature than our experiment temperature (400 °C and 300°C). Hence, there is no synergistic effect of heteroatom doped carbon and CoS<sub>2</sub> to promote the HER activity.

## Tafel slope calculation :

$$\eta = a + b \log |j|$$

where  $\eta$  is the overpotential,  $b$  is the Tafel slope and  $j$  is the current density

## Exchange current density calculation:

The exchange current density ( $j_0$ ) was calculated using extrapolation method based on Tafel equation. When the overpotential value is 0, the  $\log [j]$  values for CoS<sub>2</sub>/P and CoS<sub>2</sub> are -0.33 and -0.69, respectively.  $j_0$  for CoS<sub>2</sub>/P and CoS<sub>2</sub> are calculated to be 0.47 and 0.20 mA cm<sup>-2</sup>, respectively.

**Table S1 The comparison of HER performance of CoS<sub>2</sub> and CoS<sub>2</sub>/P with other cobalt based  
HER electrocatalysts in 0.5 M H<sub>2</sub>SO<sub>4</sub>**

| Catalyst                                     | Mass loading<br>(mg cm <sup>-2</sup> ) | Onset<br>potential<br>(mV) | $\eta$ at 10 mA<br>cm <sup>-2</sup> (mv) | $\eta$ at 100 mA<br>cm <sup>-2</sup> (mv) | Tafel slope<br>(mV dec <sup>-1</sup> ) | Ref.                 |
|----------------------------------------------|----------------------------------------|----------------------------|------------------------------------------|-------------------------------------------|----------------------------------------|----------------------|
| <b>CoS<sub>2</sub></b>                       | <b>2 ± 0.1</b>                         | <b>~50</b>                 | <b>98</b>                                | <b>157</b>                                | <b>58</b>                              | <b>This<br/>work</b> |
| <b>CoS<sub>2</sub>/P</b>                     | <b>2.5 ± 0.1</b>                       | <b>~25</b>                 | <b>67</b>                                | <b>118</b>                                | <b>50</b>                              | <b>This<br/>work</b> |
| <b>Metallic CoS<sub>2</sub><br/>nanowire</b> | <b>1.7 ± 0.3</b>                       | <b>75</b>                  | <b>145</b>                               | <b>~</b>                                  | <b>51.6</b>                            | <b>S1</b>            |
| <b>CoSe<sub>2</sub></b>                      | <b>2.8</b>                             | <b>~</b>                   | <b>137</b>                               | <b>180</b>                                | <b>42.1</b>                            | <b>S2</b>            |
| <b>CoP nanowire</b>                          | <b>0.92</b>                            | <b>38</b>                  | <b>67</b>                                | <b>204</b>                                | <b>51</b>                              | <b>S3</b>            |
| <b>CoS</b>                                   | <b>0.91</b>                            | <b>59</b>                  | <b>~</b>                                 | <b>196</b>                                | <b>56.2</b>                            | <b>S4</b>            |
| <b>CoP</b>                                   | <b>0.91</b>                            | <b>32</b>                  | <b>~</b>                                 | <b>107</b>                                | <b>54.8</b>                            | <b>S4</b>            |
| <b>N-Co@G</b>                                | <b>0.285</b>                           | <b>70</b>                  | <b>265</b>                               | <b>~</b>                                  | <b>98</b>                              | <b>S5</b>            |
| <b>CoS<sub>2</sub></b>                       | <b>0.037</b>                           | <b>~</b>                   | <b>~</b>                                 | <b>~</b>                                  | <b>44.6</b>                            | <b>S6</b>            |
| <b>CoSe<sub>2</sub></b>                      | <b>0.037</b>                           | <b>~</b>                   | <b>~</b>                                 | <b>~</b>                                  | <b>42.4</b>                            | <b>S6</b>            |
| <b>CoSe<sub>2</sub>nanobelt</b>              | <b>2.3</b>                             | <b>96</b>                  | <b>141</b>                               | <b>200</b>                                | <b>68</b>                              | <b>S7</b>            |

S1 Faber M S, Dziejcz R, Lukowski M A, et al. High-performance electrocatalysis using metallic cobalt pyrite (CoS<sub>2</sub>) micro-and nanostructures[J]. Journal of the American Chemical Society, 2014, 136(28): 10053-10061.

S2 Kong D, Wang H, Lu Z, et al. CoSe<sub>2</sub> nanoparticles grown on carbon fiber paper: an efficient and stable electrocatalyst for hydrogen evolution reaction[J]. Journal of the American Chemical Society, 2014, 136(13): 4897-4900.

S3 Tian J, Liu Q, Asiri A M, et al. Self-supported nanoporous cobalt phosphide nanowire arrays: an efficient 3D hydrogen-evolving cathode over the wide range of pH 0–14[J]. *Journal of the American Chemical Society*, 2014, 136(21): 7587-7590.

S4 Li J, Zhou X, Xia Z, et al. Facile synthesis of CoX (X= S, P) as an efficient electrocatalyst for hydrogen evolution reaction[J]. *Journal of Materials Chemistry A*, 2015.

S5 Fei H, Yang Y, Peng Z, et al. Cobalt Nanoparticles Embedded in Nitrogen-Doped Carbon for the Hydrogen Evolution Reaction[J]. *ACS applied materials & interfaces*, 2015, 7(15): 8083-8087.

S6 Kong D, Cha J J, Wang H, et al. First-row transition metal dichalcogenide catalysts for hydrogen evolution reaction[J]. *Energy & Environmental Science*, 2013, 6(12): 3553-3558.

S7 Zheng Y R, Gao M R, Yu Z Y, et al. Cobalt diselenidenanobelts grafted on carbon fiber felt: An efficient and robust 3D cathode for hydrogen production†[J]. *Chemical Science*, 2015.
